# Supplementary material for: Electrochemical properties of layered SnO and PbO for energy applications
Source: Royal Society of Chemistry journal article supplement (doi:10.1039/c5ra18776a), 2015-01-01
Supplement: c5ra18776a1.pdf [file c5ra18776a1.pdf]

ARTICLE

# Electrochemical Properties of Layered SnO and PbO for Energy Applications

Cite this: DOI: 10.1039/x0xx00000x

Chee Shan Lim<sup>a</sup>, Zdeněk Sofer<sup>b</sup>, Ondřej Jankovský<sup>b</sup>, Hong Wang<sup>a</sup>, Martin Pumera<sup>\*a</sup>

Received 00th January 2012,  
Accepted 00th January 2012

DOI: 10.1039/x0xx00000x

[www.rsc.org/](http://www.rsc.org/)

## SUPPORTING INFORMATION

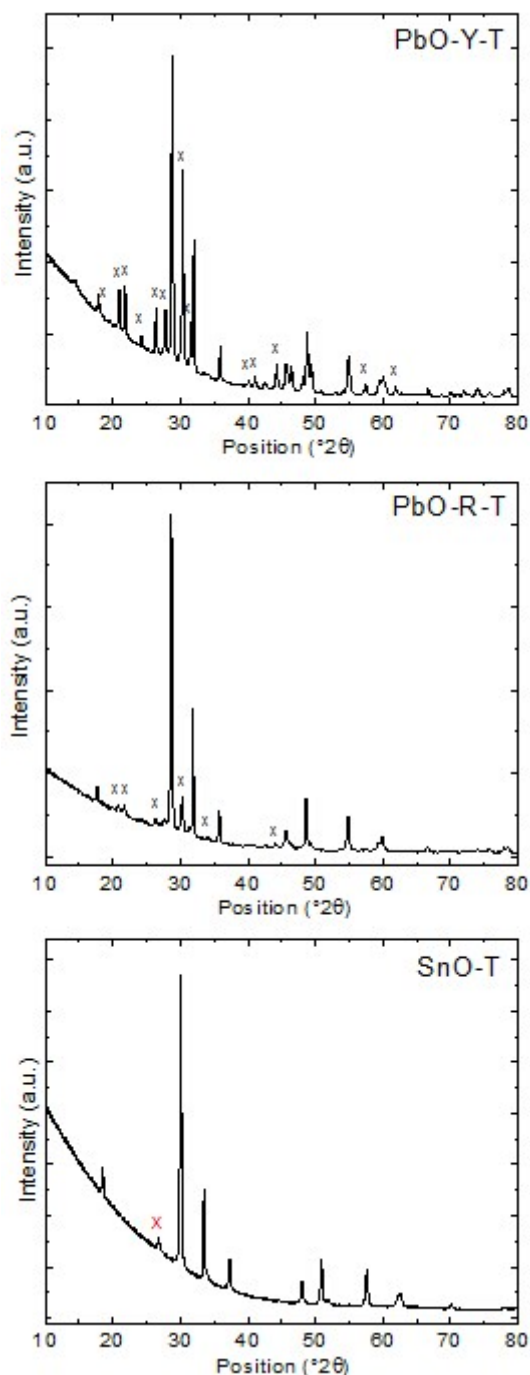

**Figure S1.** The X-ray diffractogram of PbO-Y-T, PbO-R-T and SnO-T after ten cycles of potential in the range of 0 V to +1.3 V in phosphate buffer solution (pH = 7.2, c = 0.05M, scan rate 100 mV/s). The mark (x) indicate the phase  $\text{Pb}_{10}(\text{PO}_4)_6(\text{OH})_2$  and (X) the  $\text{SnO}_2$  phase.
